# Supplementary material
Source: publisher figshare collection journal article supplement (https://sage.figshare.com/ndownloader/files/23086301)
Supplement: Supplementary file 1 [file 23086301]

## Supporting Information

Table A.1

*Pearson Correlations, Means (M), and Standard Deviations (SD) for Variables of Interest (Outliers Reduced/Removed and Log Transformed; N = 189-198)*

| Measures                           | 1   | 2   | 3   | 4 |
|------------------------------------|-----|-----|-----|---|
| 1. Evaluative attitudes            | -   |     |     |   |
| 2. Injunctive peer norms           | .90 | -   |     |   |
| 3. Past sexual aggression          | .62 | .48 | -   |   |
| 4. Likelihood of sexual aggression | .97 | .85 | .70 | - |
| <i>M (SD)</i>                      |     |     |     |   |

*Note.* All Pearson correlations were statistically significant ( $p < .01$ ).

Table A.2

*Spearman Rho Correlations, Means (M), and Standard Deviations (SD) for Variables of Interest (Full Sample; N = 200)*

| Measures                           | 1           | 2           | 3             | 4           |
|------------------------------------|-------------|-------------|---------------|-------------|
| 1. Evaluative attitudes            | -           |             |               |             |
| 2. Injunctive peer norms           | .73         | -           |               |             |
| 3. Past sexual aggression          | .50         | .46         | -             |             |
| 4. Likelihood of sexual aggression | .79         | .68         | .55           | -           |
| <i>M (SD)</i>                      | 1.19 (0.50) | 1.29 (0.58) | 21.28 (81.94) | 1.17 (0.49) |

*Note.* All Spearman Rho correlations were statistically significant ( $p < .01$ ).
